# Supplementary material for: Dual-mode sensor based on the synergy of magnetic separation and functionalized probes for the ultrasensitive detection of Clostridium perfringens
Source: Royal Society of Chemistry journal article supplement (doi:10.1039/d2ra04344k), 2022-01-01
Supplement: d2ra04344k1.pdf [file d2ra04344k1.pdf]

|    |                                                                                                 |
|----|-------------------------------------------------------------------------------------------------|
| 1  | <b>Electronic Supporting Information</b>                                                        |
| 2  | <b>Dual-mode sensor based on the synergy of magnetic separation and</b>                         |
| 3  | <b>functionalized probes for the ultrasensitive detection of <i>Clostridium perfringens</i></b> |
| 4  |                                                                                                 |
| 5  | <i>List of Contents:</i>                                                                        |
| 6  | <i>S1. The oligonucleotides employed for this work</i>                                          |
| 7  | <i>S2 The comparison between different methods for detecting C. perfringens</i>                 |
| 8  | <i>S3. Diffusion of the biosensor</i>                                                           |
| 9  | <i>S.4 Optimization of the electrochemical sensor</i>                                           |
| 10 |                                                                                                 |

11 *S1. The oligonucleotides employed for this work*

12

13 **Table S1** The sequences for oligonucleotides employed for this work.

| name        | sequence (5' to 3')                                              |
|-------------|------------------------------------------------------------------|
| DNA walker  | TTTTTTTTTTTTTTTTTTTTTTTTTACAGAGCACGGGAATGTTACTGCCTGT             |
| Aptamer     | TCA ACG GCA GTA ACA TTA GC                                       |
| H1          | TTTTTT ACA GGC AGT AAC TAA GCC GTAGAT GTT ACT GCC ACG<br>TGC GGA |
| H2          | TTTTTTCCG TCA TTGATT CGG CAT CTA CAA TGA CGG                     |
| Trigger DNA | TACTTTGCCTATCC GCA CGT                                           |
| H3          | AA-GGTTGTATAGTAGGCAAAGTAACTATACAACCTACTACCTCA                    |
| H4          | ACTTTGCCTACTATACAATGAGGTAGTAGGTTGTATAGTAGG-AA                    |
| CPAF1       | GCT AAT ACT GCC GTT GA                                           |
| CPAR1       | CCT CTG ATA CAT GTA AG                                           |
| CPAF2       | GCT TAT TTG TGC CGC GCT A                                        |
| CPAR2       | CAT AGC ATC AGT TCC TGT TCC A                                    |
| AlphaF      | GAT TGA TGG AAC AGG AAC TC                                       |
| AlphaR      | ACG GCA GTA ACA TTA GCA                                          |
| PlcF        | TTG GAG AGG CTA TGC ACT ATT TT                                   |
| plc         | CTT AAC ATG TCC TGC GCT ATC A                                    |

14

15

16 **S2. The comparison between different detection methods for sensing *C. perfringens***

17 **Table S2** The comparison between different methods for detecting *C. perfringens*.

| Method                   | System                                               | Detection range                                  | LOD                      | Assay time        | reference |
|--------------------------|------------------------------------------------------|--------------------------------------------------|--------------------------|-------------------|-----------|
| LAMP                     | -                                                    | $0 \sim 1.2 \times 10^8$ CFU mL <sup>-1</sup>    | 12 CFU/mL                | 12 h              | 1         |
| Electrochemiluminescence | gold electrode (rolling circle amplification)        | $10^{-15} \sim 10^{-9}$ M                        | $10^{-15}$ M             | Approximately 1 h | 2         |
| DPV                      | SA/ADH/Fe <sub>3</sub> O <sub>4</sub> nanocomposites | $10^{-12} \sim 10^{-6}$ M                        | $10^{-12}$ M             | Same as PCR       | 3         |
| EIS                      | CeO <sub>2</sub> /chitosan/GCE                       | $10^{-14} \sim 10^{-7}$ M                        | $7.06 \times 10^{-15}$ M | -                 | 4         |
| PCR and RPA              | Real-time PCR and real-time RPA                      | $2 \sim 1.0 \times 10^{10}$ CFU mL <sup>-1</sup> | 2 CFU mL <sup>-1</sup>   | 14 ~ 46 min       | 5         |
| LAMP-LFB                 | -                                                    | $0.01 \sim 10^6$ CFU mL <sup>-1</sup>            | 10 CFU g <sup>-1</sup>   | 24 h              | 6         |
| PSR                      | -                                                    | 80 ng μl <sup>-1</sup> ~ 0.8 fg μl <sup>-1</sup> | 80 fg μl <sup>-1</sup>   | Same as PCR       | 7         |
| DPV                      | DNA walker/HCR/MGCE                                  | $1 \sim 10^8$ CFU mL <sup>-1</sup>               | 1 CFU mL <sup>-1</sup>   | 8 h               | This work |

18 \*RPA: Polymerase Amplification Assays; LAMP-LFB: loop-mediated isothermal amplification in combination with a lateral-flow biosensor;

19 PSR: polymerase spiral reaction.

20

21

### 22 *S3. Diffusion of the biosensor*

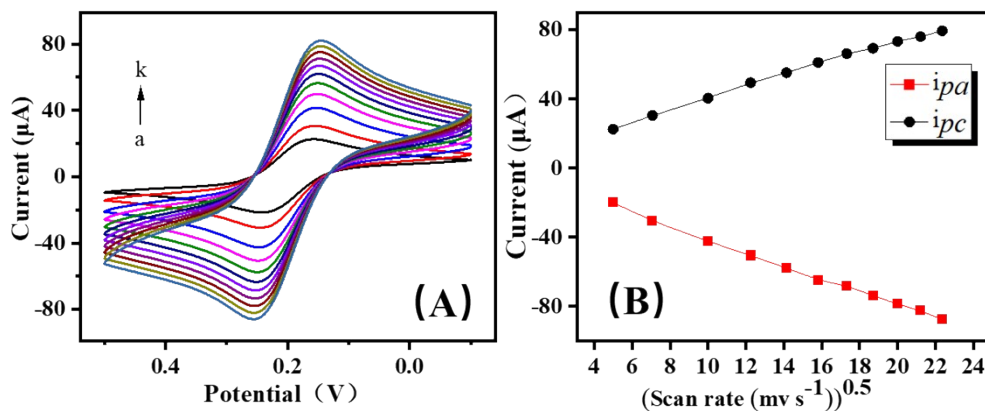

23

24 **Fig. S1.** (A) CVs of the DNA biosensor in electrolyte solution at different scan rates of  
25 (a) 25, (b) 50, (c) 100, (d) 150, (e) 200, (f) 250, (g) 300, (h) 350, (i) 400, (j) 450, and  
26 (k) 500 mV/s. (B) The linear relationship between the peak value and the square root  
27 of different scanning rates. 4lg CFU/mL of *C. perfringens* was used.

28

### 29 *S4. Optimization of the electrochemical sensor*

30 There is no doubt that the sensitivity of the sensor depends not only on the  
31 synergistic strategy but also on the embed of MB. On the other hand, aptamer are the  
32 bridges for communication between dual-mode sensors. What's more important, time  
33 is particularly important for biosensor, as well. In recent years, in the research of DNA  
34 sensors, the construction process of sensors is mostly carried out at conventional room  
35 temperature; and the pH is around 7.0. This is because the acidic or alkaline buffer may  
36 damage the structure of the DNA strand. Therefore, in order to carry out the experiment  
37 smoothly, the sensor construction temperature of this experiment is 25 °C, and the  
38 buffer pH is adjusted to 7.0<sup>8-12</sup>. Therefore, the concentration of aptamer; The  
39 concentration of MB; The time of MB participating in the reaction, and the dosage of  
40 CMBS were optimized.

41 As shown in Fig. S2A, the molarity Aptamer was investigated. the concentration  
42 of Aptamer gradually decreased, and the DPV signal decreases accordingly, the  
43 attenuation is attributed to that insufficient amount of Aptamer added to modify the  
44 binding site exposed by DNA walker on the CMB surface, which is then bound by

45 bovine serum protein in the subsequent blocking reaction, resulting in reduced DPV  
46 signal. Thus, 1  $\mu\text{M}$  is selected as the Aptamer dosage.

47 As one of the signal enlargement strategies of this sensor, the application of MB  
48 optimizes the reaction concentration and reaction time of MB. As shown in Figures  
49 S2B and C, with the increase of MB concentration and reaction time, the electrical  
50 signal increases gradually. When MB concentration reaches 10  $\mu\text{M}$  and reaction time  
51 reaches 60 min, the electrical signal does not increase but becomes stable. This trend is  
52 due to the full incorporation of MB into the DNA chain structure. Thus, a concentration  
53 of 10  $\mu\text{M}$  MB and a reaction time of 60 min were selected as the optimal conditions.

54 As the basis of this dual-mode sensor, the amount of CMBs is also worth  
55 considering. As shown in Fig. S2D, with the continuous increase of the amount of  
56 CMBs, the peak value of the electrical signal increases. When the amount of CMBs  
57 increases to 10  $\mu\text{L}$ . This trend is gradually gentle, and the increase of the peak value of  
58 the electric signal is decreasing. Therefore, 10  $\mu\text{L}$  as the optimum condition.

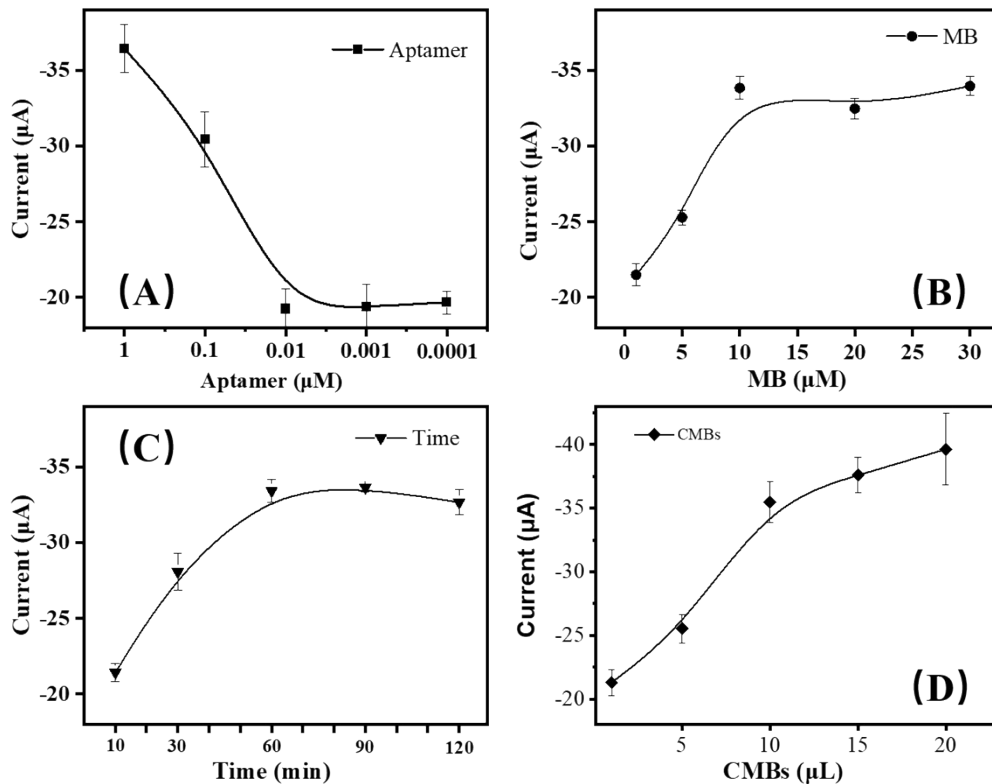

59

60 **Fig S2.** Optimization of experimental conditions (A) Concentration of aptamer: 1,

61 0.1, 0.001, 0.0001  $\mu\text{M}$ ; (B) Concentration of MB: 0, 5, 10, 20, 30  $\mu\text{M}$ ; (C) Reaction  
62 time of MB: 10, 30, 60, 90, 120 min; (D) Addition amount of CMBs: 1, 5, 10, 15, 20  
63  $\mu\text{L}$ . 4lg CFU/mL *C. perfringens* was used. Error bars showed the standard deviation of  
64 three experiments.

65

## 66 *reference*

- 67 1. G. B. Priya, R. K. Agrawal, A. A. P. Milton, M. Mishra, S. K. Mendiratta, R. K.  
68 Agarwal, A. Luke, B. R. Singh, and D. Kumar, *Anaerobe*, 2018, **54**, 178-187,  
69 DOI: 10.1016/j.anaerobe.2018.09.005.
- 70 2. D. N. Jiang, F. Liu, C. Liu, L. L. Liu, Y. Li and X. Y. Pu, *Analytical Methods*, 2014,  
71 **6**, 1558-1562, DOI: 10.1039/C3AY41961D.
- 72 3. D. N. Jiang, F. Liu, L. Q. Zhang, L. L. Liu, C. Liu, and X. Y. Pu, *Rsc Advances*,  
73 2014, **4**, 57064-57070, DOI: 10.1039/C4RA09834J.
- 74 4. X. Qian, Q. Qu, L. Li, X. Ran, L. Zuo, R. Huang, and Q. Wang, *Sensors*, 2018, **18**,  
75 1878, DOI: 10.3390/s18061878.
- 76 5. L. Liu, R. Li, Z. Chen, J. Wang, X. Sun, W. Yuan and J. Wang, *Food Science*, 2020,  
77 **41**, 268-272, DOI: 10.7506/spkx1002-6630-20181026-307.
- 78 6. T. Sridapan, W. Tangkawsakul, T. Janvilisri, W. Kiatpathomchai, S. Dangtip, N.  
79 Ngamwongsatit, D. Nacapricha, P. Ounjai and S. Chankhamhaengdecha, *Plos*  
80 *One*, 2021, **16**, e0245144, DOI: 10.1371/journal.pone.0245144.
- 81 7. A. A. P. Milton, K. M. Momin, S. Ghatak, G. B. Priya, M. Angappan, S. Das, K.  
82 Puro, R. K. Sanjukta, I. Shakuntala, A. Sen and B. K. Kandpal, *Heliyon*, 2021,  
83 **7**, e05941, DOI: 10.1016/j.heliyon.2021.e05941
- 84 8. W. Zhang, P. Zhang, Y. Liang, W. Cheng, L. Li, H. Wang, Z. Yu, Y. Liu, and X.  
85 Zhang, *RSC Advances*, 2022, **12**, 13448-13455, DOI: 10.1039/D2RA01817A.
- 86 9. N. D. Md. Sani, E. Y. Ariffin, W. Sheryn, M. A. Shamsuddin, L. Y. Heng, J. Latip,  
87 S. A. Hasbullah and N. I. Hassan, *Sensors*, 2019, **19**, 5111, DOI:  
88 10.3390/s19235111.
- 89 10. J. Jeong, H. Kim, D. J. Lee, B. J. Jung, and J. B. Lee, *Nanoscale Research Letters*,  
90 2016, **11**, 242, DOI: 10.1186/s11671-016-1440-7.
- 91 11. Y. Mao, Y. Chen, S. Li, S. Lin, and Y. Jiang, *Sensors*, 2015, **15**, 28244-28256, DOI:  
92 10.3390/s151128244
- 93 12. E. Yuhana Ariffin, L. Y. Heng, L. L. Tan, N. H. Abd Karim and S. A. Hasbullah,  
94 *Sensors*, 2020, **20**, 1279, DOI: 10.3390/s20051279.

95

96

97
